# Supplementary material
Source: PubMed Central journal article supplement (PMC3993364)
Supplement: JB.01287-13_zjb999093100so1.pdf [file JB.01287-13_zjb999093100so1.pdf]

## Supporting material

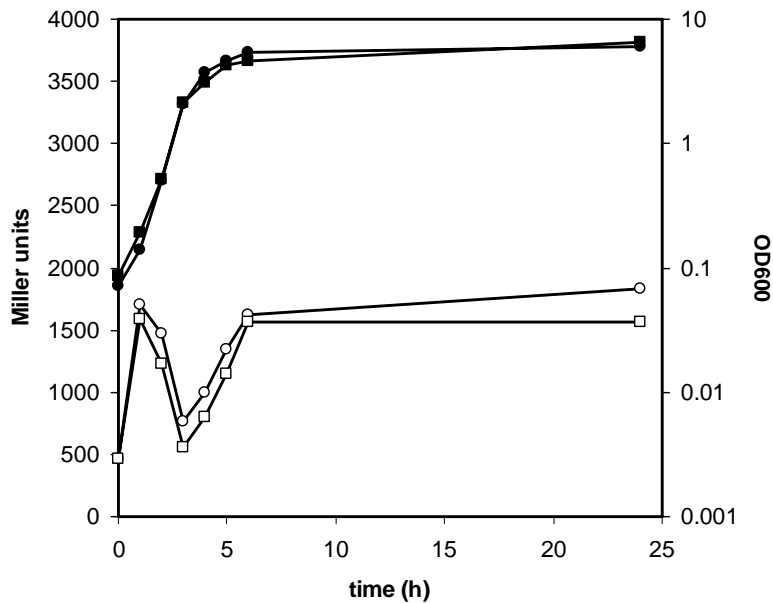

**Figure S1.** Growth (closed symbols) and  $\beta$ -galactosidase activity (open symbols) of KT2440 (circles) and the *rpoS* mutant C1R1 (squares) harboring the *lapA::lacZ* translational fusion in pMMGA.

```

lapA  GATGGCATGTATAAGGTCAATAGTTTGGCA-G--TCAGGCAATTCCAAAAAGTTATAG
flhA  TTTTCAATCAATGAATTGAAAAGTT-GGAACGGTTCCTGCAAT---GACCCGCCCGAC

lapA  ACGGAATATTGCGTCCAAAAACGTCAAGAGATCATCGACATAGTTCCGCCTGAAGT-G
flhA  GC-GCATTCCGGCGTCAAAAAGTTTGTTCGGCGCCACCCACGGG--CGCCCATACGCAG

lapA  GCTAGCAAGCGCCGCTCTGGCAGGGAAGTACCCCATCGGGTCACACGGAGAGTCCAATG
flhA  GGCAGGGGAGTCGAGAGGTG

```

**Figure S2.** Alignment between the promoter regions of *lapA* of *P. putida* and *flhA* of *P. aeruginosa*. Shown in bold is the sequence corresponding to the FleQ box (obtained from the PRODORIC database: <http://prodoric.tu-bs.de/>) and the corresponding putative site in the *lapA* promoter region. Translation start codons are shown in blue.

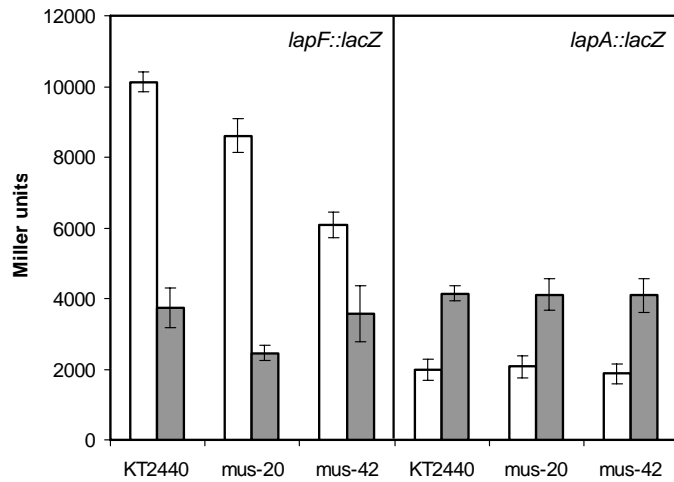

**Figure S3.** Analysis of  $\beta$ -galactosidase activity of the *lapF::lacZ* and *lapA::lacZ* fusions in KT2440, mus-20 (*lapF* mutant) and mus-42 (*lapA* mutant) harboring (grey bars) or not (white bars) plasmid pMAMV1, which confers high levels of c-di-GMP. Results are averages and standard deviations from three experiments with duplicate samples, in cultures after overnight growth in LB.
